# Supplementary material for: High Mobility Group Box-1 Protein and Outcomes in Critically Ill Surgical Patients Requiring Open Abdominal Management
Source: Hindawi journal article supplement (doi:10.1155/2017/6305387), 2017-01-01
Supplement: f1 [file 6305387.f1.pdf]

## On-Line Supplements

On-line Supplemental Table 1

Demographic characteristics of patients enrolled in the Peritoneal VAC trial

| Variable                                                          | ABThera (n = 23) | Barker's Vacuum Pack (n = 22) | P     |
|-------------------------------------------------------------------|------------------|-------------------------------|-------|
| Age, median (IQR), yr                                             | 56 (39–71)       | 56 (33–68)                    | 0.83  |
| Male sex, n (%)                                                   | 19 (82.6)        | 18 (81.8)                     | >0.99 |
| Abdominal injury, n%                                              | 10 (43.5)        | 11 (50.0)                     | 0.77  |
| Penetrating, n/total n (%)                                        | 6/10 (60.0)      | 2/11 (18.2)                   | 0.08  |
| Mechanism of injury, no./total no. (%)                            |                  |                               |       |
| Motor vehicle collision                                           | 2/10 (20.0)      | 6/11 (54.5)                   | 0.14  |
| Pedestrian vs motor vehicle                                       | 0/10 (0)         | 1/11 (9.1)                    | 1.0   |
| Gunshot wound                                                     | 3/10 (30.0)      | 2/11 (18.2)                   | 0.64  |
| Stab wound                                                        | 3/10 (30.0)      | 0/11 (0)                      | 0.09  |
| Other                                                             | 2/10 (20.0)      | 2/11 (18.2)                   | 1.0   |
| Injury Severity Scale score, median (IQR)*                        | 23 (18–34)       | 34 (22–34)                    | 0.32  |
| Revised Trauma score, median (IQR)†                               | 5.4 (1.8–7.8)    | 5.3 (1.0–6.4)                 | 0.45  |
| Abbreviated Injury Scale scoring, mean ± SD‡                      |                  |                               |       |
| Head and neck                                                     | 4.0 ± 0          | 3.25 ± 0.5                    | 0.10  |
| Thorax                                                            | 2.9 ± 1.0        | 3.7 ± 0.9                     | 0.08  |
| Abdomen                                                           | 3.6 ± 0.7        | 3.1 ± 1.2                     | 0.20  |
| Extremities/pelvis                                                | 3.0 ± 0          | 2.667 ± 0.5                   | 0.50  |
| APACHE-II score, mean ± SD§                                       | 22.5 ± 8.9       | 26.6 ± 11.9                   | 0.20  |
| SOFA score, mean ± SD¶                                            | 7.7 ± 3.9        | 9.4 (4.7)                     | 0.19  |
| Charlson Comorbidity Index score, median (IQR)                    | 3 (1–6)          | 2 (0–3)                       | 0.04  |
| Worst physiologic measurements before randomization, median (IQR) |                  |                               |       |
| Systolic blood pressure, mm Hg                                    | 90 (80–108)      | 84 (60–91)                    | 0.27  |
| Temperature (injured patients), °C                                | 36 (35.8–36.3)   | 35.3 (33.5–36)                | 0.15  |
| Temperature (sepsis patients), °C                                 | 36.2 (36–38.1)   | 37.6 (36.6–38.6)              | 0.13  |
| pH                                                                | 7.2 (7.1–7.3)    | 7.2 (7.1–7.2)                 | 0.15  |
| Lactate, mmol/L                                                   | 3.6 (1.8–6.6)    | 6.3 (2.3–10.3)                | 0.06  |
| Base deficit, mmol/L                                              | 10 (7–17)        | 12 (9.5–17.5)                 | 0.40  |
| INR                                                               | 1.5 (1.1–1.8)    | 1.5 (21.2–1.7)                | 0.84  |
| Fluid administration before randomization, median (IQR)           |                  |                               |       |
| PRBC, units (n = 21 injured patients)                             | 10 (3–20)        | 12 (6–22)                     | 0.30  |
| FFP, units (n = 21 injured patients)                              | 2.5 (2–8)        | 3 (0–6)                       | 0.54  |
| PRBC/FFP ratio (n = 21 injured patients)                          | 4:1              | 4:1                           |       |
| Crystalloid, L                                                    | 2.5 (1–3.3)      | 3.2 (2–4.5)                   | 0.21  |
| Patient location before OR admission, n (%)                       |                  |                               |       |
| Emergency department                                              | 12 (52.2)        | 15 (68.2)                     | 0.73  |
| Hospital ward                                                     | 5 (21.7)         | 2 (9.1)                       | 0.41  |
| Intensive care unit                                               | 6 (26.1)         | 5 (22.7)                      | 1.0   |
| Vasopressors required before randomization, n (%)                 | 16 (69.6)        | 16 (76.2)                     | 0.44  |
| Hours from injury to laparotomy, median (IQR)                     | 2 (2–5)          | 5 (2–7)                       | 0.38  |
| Hours from sepsis diagnosis to laparotomy, median (IQR)           | 10 (5–12)        | 10 (5–10)                     | 0.74  |

\* Values for the Injury Severity score ranged from 0 to 75. Higher values indicate more severe injury.

† Values for the Revised Trauma score range from 0 to 7.84. Higher values indicate greater survival probability.

‡ Scores on the Abbreviated Injury Scale range from 1 to 6. Higher values indicate more severe injury.

§ Scores on the APACHE-II scale range from 0 to 71. Higher values indicate greater illness severity.

¶ Scores on the SOFA scale range from 0 to 24. Higher values indicate greater illness severity.

|| Scores on the Charlson Comorbidity Index range from 0 to 6. Higher scores indicate a lower survival probability.

APACHE indicates Acute Physiology and Chronic Health Evaluation; FFP, fresh frozen plasma; INR, international normalized ratio; OR, operating room; PRBC, packed red blood cells; SOFA, Sequential Organ Failure Assessment.

Reproduced from Kirkpatrick et., Active Negative Pressure Peritoneal Therapy After Abbreviated Laparotomy: The Intraperitoneal Vacuum Randomized Controlled Trial, Ann Surg 262(1), July 2015, p 38–46 (Open Access)

## On-line supplement table 2

## HMGB-1 levels between different TAC groups

|                 | ANPPT HMGB-1 concentration (pg/mL) | BVP HMGB-1 concentration (pg/mL) | p-value  |
|-----------------|------------------------------------|----------------------------------|----------|
| <b>Baseline</b> | 2545.64 (1867.36 - 3601.18375)     | 2084.44 (1582.71 - 2723.94)      | p = 0.17 |
| <b>24 hours</b> | 3182.71 (2114.17 - 4894.15)        | 2217.10 (2001.33 - 3989.70)      | p = 0.30 |
| <b>48 hours</b> | 2272.94 (1811.20 - 2938.98)        | 2591.89 (1994.90 - 3552.63)      | p = 0.42 |

On-line supplement table 3

## HMGB-1 levels for septic and trauma patient groups

|                 | Sepsis HMGB-1 concentration (pg/mL) | Trauma HMGB-1 concentration (pg/mL) | p-value     |
|-----------------|-------------------------------------|-------------------------------------|-------------|
| <b>Baseline</b> | 2567.78 (2058.57 - 3651.07)         | 1718.34 (1580.73 - 2334.22)         | p = 0.02*** |
| <b>24 hours</b> | 3173.53 (2217.10 - 3827.10)         | 2101.20 (1972.91 - 4996.18)         | p = 0.38    |
| <b>48 hours</b> | 2522.76 (2100.61 - 3387.28)         | 2060.40 (1709.61 - 2791.01)         | p = 0.06    |

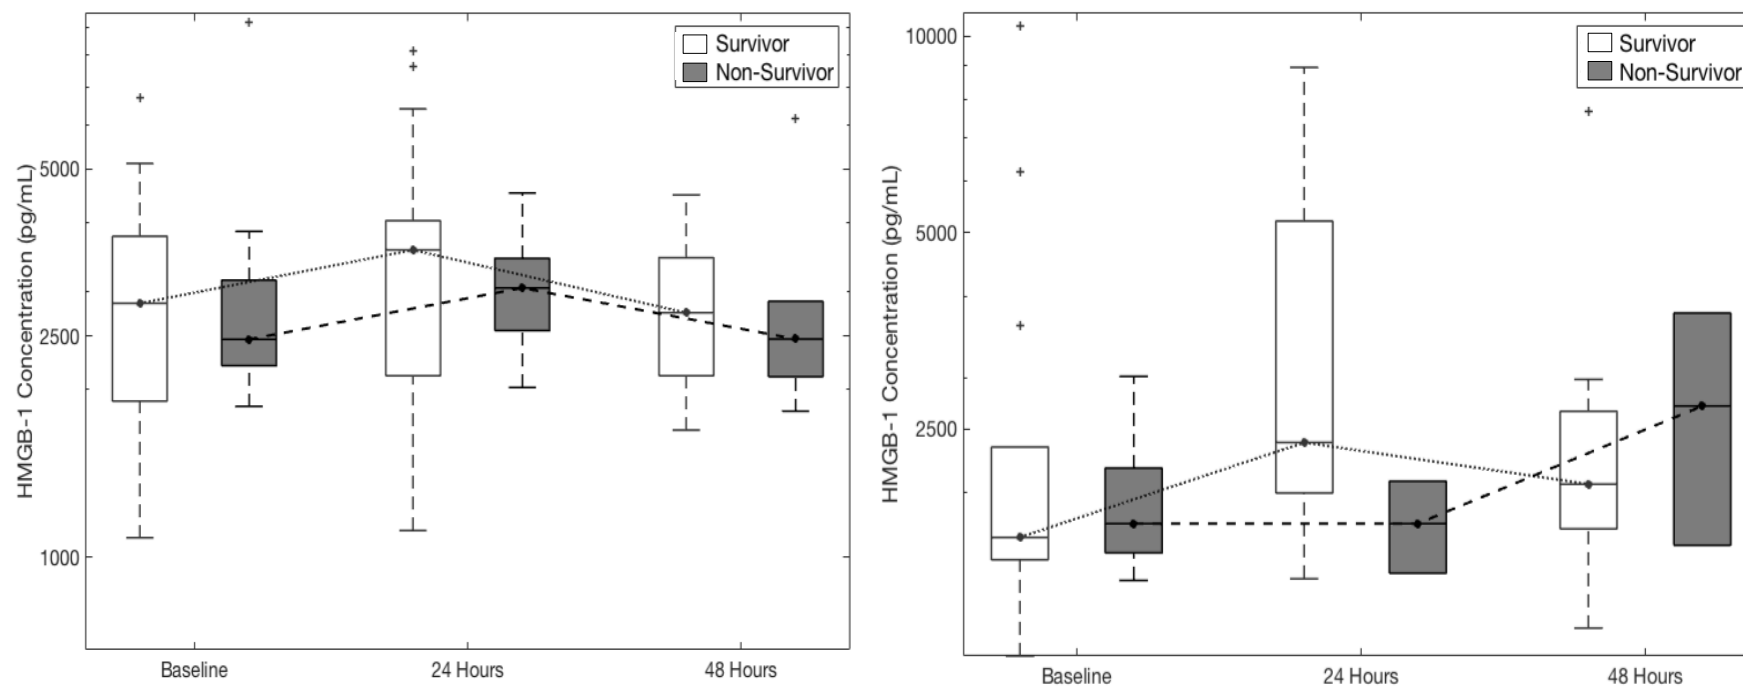

Differential behaviour of HMGB-1 plasma levels between survivors and non-survivors in relation to underlying patient condition measured at baseline, 24 and 48 hours after re-laparotomy. **a)** Septic patient group (15 survivors; 9 non-survivors). **b)** Trauma patient group (14 survivors; 6 non-survivors)
